# Supplementary material for: Glycated fish protein supplementation modulated gut microbiota composition and reduced inflammation but increased accumulation of advanced glycation end products in high-fat diet fed rats
Source: Royal Society of Chemistry journal article supplement (doi:10.1039/c9fo00599d), 2019-01-01
Supplement: c9fo00599d1.pdf [file c9fo00599d1.pdf]

## Supporting Information

| Item/(mmol/L) | Diet                   |                        |
|---------------|------------------------|------------------------|
|               | CK                     | HD                     |
| TC            | 1.57±0.19 <sup>a</sup> | 1.94±0.17 <sup>b</sup> |
| TG            | 0.97±0.23 <sup>a</sup> | 1.30±0.16 <sup>b</sup> |
| HDL-C         | 0.70±0.17 <sup>a</sup> | 0.26±0.11 <sup>b</sup> |
| LDL-C         | 0.97±0.13 <sup>a</sup> | 1.28±0.12 <sup>b</sup> |

**Supporting Information Table S1.** The levels of serum TC, TG, HDL-C, and LDL-C in rats fed the low-fat control (CK) diet and the 45% high-fat (HD) diet for 4 weeks. Values were expressed as the mean ± SD. Different letters in the same line indicate significant differences ( $p < 0.05$ ).

| Ingredient          | FP Diet | L-GP Diet | H-GP Diet |
|---------------------|---------|-----------|-----------|
| Casein              | 0       | 0         | 0         |
| Corn starch         | 75.1    | 74.3      | 73.5      |
| Maltodextrin        | 123.3   | 121.9     | 120.6     |
| Sucrose             | 208.6   | 200.9     | 193.3     |
| Soybean oil         | 30.8    | 30.5      | 30.2      |
| Lard                | 201.0   | 198.9     | 196.7     |
| Cellulose           | 61.1    | 61.0      | 60.3      |
| Mineral mix M1020   | 50.1    | 49.6      | 49.1      |
| Vitamin mix V1010   | 12.3    | 12.2      | 12.1      |
| L-Cystine           | 3.7     | 3.7       | 3.6       |
| Choline Bitartrate  | 3.1     | 3.0       | 3.0       |
| t-Butylhydroquinone | 0.046   | 0.046     | 0.045     |
| FP                  | 230.3   | 162.0     | 95.1      |
| GP                  | 0.0     | 82.1      | 162.4     |

**Supporting Information Table S2.** Compositions (g/kg) of experimental diets. FP Diet, the modified 45% high-fat diet with 20% fish protein (FP); L-GP Diet, the modified 45% high-fat diet with 14% FP and 6% glycated fish protein (GP); H-GP Diet, the modified 45% high-fat diet with 8% FP and 12% GP.

| Genes    |         | Oligonucleotide sequence (5'-3') |
|----------|---------|----------------------------------|
| β-actin  | Forward | AGCCATGTACGTAGCCATCC             |
|          | Reverse | ACCCTCATAGATGGGCACAG             |
| IL-1β    | Forward | AGGAGAGACAAGCAACGACAA            |
|          | Reverse | GTTTGGGATCCCACTCTCCA             |
| occludin | Forward | GATAATTGACTGGGCTGAACACTC         |
|          | Reverse | GGAACACACTTGGGTATCAAGACAT        |

**Supporting Information Table S3.** Gene-specific primer for qRT-PCR analysis

| Sample    | Bound sugar (%) | Furosine (mg/100 mg protein) | Fluorescence intensity (AU/g protein) | CML (mg/kg sample)      | CEL (mg/kg sample)     |
|-----------|-----------------|------------------------------|---------------------------------------|-------------------------|------------------------|
| FP        | --              | 0.21±0.02 <sup>a</sup>       | 38937±815 <sup>a</sup>                | 12.38±2.15 <sup>a</sup> | 5.08±0.22 <sup>a</sup> |
| GP        | 4.96±0.17       | 3.72±0.09 <sup>b</sup>       | 78549±616 <sup>b</sup>                | 18.37±0.06 <sup>b</sup> | 7.08±0.07 <sup>b</sup> |
| FP Diet   | --              | 0.15±0.01 <sup>a</sup>       | 11990±1081 <sup>a</sup>               | 7.89±0.25 <sup>a</sup>  | 4.76±0.28 <sup>a</sup> |
| L-GP Diet | --              | 1.08±0.03 <sup>b</sup>       | 15143±903 <sup>b</sup>                | 9.71±0.81 <sup>b</sup>  | 5.99±0.72 <sup>b</sup> |
| H-GP Diet | --              | 2.00±0.15 <sup>c</sup>       | 21183±792 <sup>c</sup>                | 12.48±0.66 <sup>c</sup> | 6.80±0.07 <sup>b</sup> |

**Supporting Information Table S4.** The MRP content of fish protein (FP), glycated fish protein (GP), the modified 45% high-fat diet with 20% FP (FP Diet), the modified 45% high-fat diet with 14% FP and 6% GP (L-GP Diet), and the modified 45% high-fat diet with 8% FP and 12% GP (H-GP Diet). Data were expressed as mean ± SD (n=3). Different letters in in the same column indicate significant differences ( $p < 0.05$ ).

| Amino acid | mg/100mg protein        |                         |                         |
|------------|-------------------------|-------------------------|-------------------------|
|            | FP Diet                 | L-GP Diet               | H-GP Diet               |
| Asp        | 10.54±0.01 <sup>a</sup> | 10.67±1.43 <sup>a</sup> | 10.24±0.13 <sup>a</sup> |
| Thr        | 4.69±0.05 <sup>a</sup>  | 4.76±0.61 <sup>a</sup>  | 4.67±0.08 <sup>a</sup>  |
| Ser        | 4.57±0.21 <sup>a</sup>  | 4.60±0.55 <sup>a</sup>  | 4.56±0.14 <sup>a</sup>  |
| Glu        | 19.80±1.21 <sup>a</sup> | 20.16±2.34 <sup>a</sup> | 20.00±0.51 <sup>a</sup> |
| Gly        | 4.73±0.08 <sup>a</sup>  | 4.83±0.51 <sup>a</sup>  | 4.73±0.22 <sup>a</sup>  |
| Ala        | 6.50±0.32 <sup>a</sup>  | 6.47±0.76 <sup>a</sup>  | 6.34±0.27 <sup>a</sup>  |
| Cys        | 2.61±1.04 <sup>a</sup>  | 2.21±0.32 <sup>a</sup>  | 2.09±0.78 <sup>a</sup>  |
| Val        | 5.14±0.11 <sup>a</sup>  | 5.27±0.61 <sup>a</sup>  | 5.32±0.26 <sup>a</sup>  |
| Met        | 0.69±0.07 <sup>a</sup>  | 0.68±0.10 <sup>a</sup>  | 0.68±0.02 <sup>a</sup>  |
| Ile        | 4.89±0.19 <sup>a</sup>  | 4.99±0.57 <sup>a</sup>  | 4.91±0.36 <sup>a</sup>  |
| Leu        | 8.79±0.39 <sup>a</sup>  | 9.05±1.13 <sup>a</sup>  | 9.09±0.64 <sup>a</sup>  |
| Tyr        | 3.30±0.23 <sup>a</sup>  | 3.29±0.28 <sup>a</sup>  | 3.30±0.17 <sup>a</sup>  |
| Phe        | 3.94±0.15 <sup>a</sup>  | 4.07±0.32 <sup>a</sup>  | 3.93±0.23 <sup>a</sup>  |
| His        | 2.59±0.07 <sup>a</sup>  | 2.82±0.30 <sup>a</sup>  | 2.81±0.31 <sup>a</sup>  |
| Lys        | 10.36±0.33 <sup>b</sup> | 8.81±0.58 <sup>a</sup>  | 7.81±0.48 <sup>a</sup>  |
| Arg        | 6.91±0.18 <sup>a</sup>  | 6.75±0.92 <sup>a</sup>  | 6.62±0.27 <sup>a</sup>  |
| Pro        | 3.54±0.04 <sup>a</sup>  | 3.56±0.66 <sup>a</sup>  | 3.52±0.29 <sup>a</sup>  |

**Supporting Information Table S5.** The amino acid composition of the modified 45% high-fat diet with 20% fish protein (FP) (FP Diet), the modified 45% high-fat diet with 14% FP and 6% glycated fish protein (GP) (L-GP Diet), and the modified 45% high-fat diet with 8% FP and 12% GP (H-GP Diet). Data were expressed as mean ± SD (n=3). Different letters in the same line indicate significant differences ( $p < 0.05$ ).
